RESEARCH ARTICLE

# The critical role of timely medical emergency team activation in oncological and non-oncological patients

Kaspar F. Bachmann<sup>1</sup>, Samuel J. Michimura<sup>1</sup>, Luca Cioccari<sup>1,2</sup>, Joerg C. Schefold<sup>1</sup>, Anna S. Messmer<sup>1\*</sup>

**1** Department of Intensive Care Medicine, Inselspital, Bern University Hospital, University of Bern, Bern, Switzerland, **2** Department of Intensive Care Medicine, Kantonsspital Aarau, Aarau, Switzerland

\* [anna.messmer@insel.ch](mailto:anna.messmer@insel.ch)

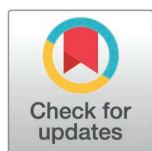

## OPEN ACCESS

**Citation:** Bachmann KF, Michimura SJ, Cioccari L, Schefold JC, Messmer AS (2025) The critical role of timely medical emergency team activation in oncological and non-oncological patients. PLoS One 20(6): e0324831. <https://doi.org/10.1371/journal.pone.0324831>

**Editor:** Vinaya Satyawati Tari, Universitas Airlangga, INDONESIA

**Received:** January 20, 2025

**Accepted:** May 1, 2025

**Published:** June 2, 2025

**Copyright:** © 2025 Bachmann et al. This is an open access article distributed under the terms of the [Creative Commons Attribution License](https://creativecommons.org/licenses/by/4.0/), which permits unrestricted use, distribution, and reproduction in any medium, provided the original author and source are credited.

**Data availability statement:** Availability of data and material: The data is available upon reasonable non-commercial request from the corresponding author. The non-author institutional point of contact for data access is: University Hospital Bern, Inselspital, Insel Data Science Centre, [IDSC.DD@insel.ch](mailto:IDSC.DD@insel.ch)

## Abstract

### Purpose

This study aimed to analyse the impact of time from first physiological derangement (positive Vital Sign Score, VSS) to Medical Emergency Team (MET) activation on mortality in oncological versus non-oncological patients.

### Methods

All in-hospital patients requiring a MET assessment were included. The primary outcome was 30-day mortality. Subanalyses were performed for the population that was admitted to the ICU as well as the subgroups of oncological with solid vs. haematological cancer. In addition, we assessed the number and time points of VSS measurements in oncological and non-oncological patients.

### Results

286 out of 4068 (8.9%) documented MET calls were attributed to oncological patients. Each hour delay from first abnormal VSS to MET activation was associated with an 3% increase in adjusted 30-day all-cause mortality odds (OR 1.03, 95% CI 1.02–1.05,  $p < 0.001$ ), independent of oncological status (interaction  $p = 0.141$ ). Oncological patients had a significantly higher number of vital sign measurements on the ward (median 24 [16–37] vs 18 [10–27],  $p < 0.001$ ) before MET activation, and higher 30-day all-cause mortality (38.1% vs 21.8%,  $p < 0.001$ ).

### Conclusions

Although the overall outcome did not differ between, oncological patients comprised 10% of MET calls, had higher mortality and had significantly more frequent vital sign

**Funding:** The author(s) received no specific funding for this work.

**Competing interests:** I have read the journal's policy and the authors of this manuscript have the following competing interests:

Anna Messmer, Kaspar Bachmann and Joerg Schefold are affiliated with the Department of Intensive Care Medicine, which reports grants from Orion Pharma, Abbott Nutrition International, B. Braun Medical AG, CSEM AG, Edwards Lifesciences Services GmbH, Kenta Biotech Ltd, Maquet Critical Care AB, Omnicare Clinical Research AG, Nestle, Pierre Fabre Pharma AG, Pfizer, Bard Medica S.A., Abbott AG, Anandic Medical Systems, Pan Gas AG Healthcare, Bracco, Hamilton Medical AG, Fresenius Kabi, Getinge Group Maquet AG, Dräger AG, Teleflex Medical GmbH, Glaxo Smith Kline, Merck Sharp and Dohme AG, Eli Lilly and Company, Baxter, Astellas, Astra Zeneca, CSL Behring, Novartis, Covidien, Phagenesis, Cytel, and Nycomed outside the submitted work. The money was paid into departmental funds; no personal financial gain applied. Luca Cioccarri has received educational grants from Hamilton Medical and speaker fees from OrphaSwiss, not related to this work. All other authors have nothing to disclose. This does not alter our adherence to PLOS ONE policies on sharing data and materials.

**ABBREVIATIONS:** APACHE II, Acute Physiologic Assessment and Chronic Health Evaluation; AUC-ROC, Area under the Receiver Operating Characteristic Curve; BMI, Body Mass Index; CI, Confidence Interval; DNR, Do not resuscitate; EC, Ethical Committee; GCS, Glasgow Coma Scale; ICU, Intensive Care Unit; IMC, Intermediate Care Unit; MET, Medical Emergency Team; OR, Odds Ratio; STROBE, STrengthening the Reporting of OBservational studies in Epidemiology; TTM, Time to MET activation; VSS, Vital Sign Score.

monitoring, reflecting greater clinical concern. Tailored monitoring including early MET review has potential to improve outcomes particularly in high-risk oncological patients.

## Background

Cancer remains one of the most common causes of morbidity and mortality around the globe [1], with approximately 40% of all people worldwide being diagnosed with cancer during their lifetime [2]. With advances in cancer treatment, the long-term outcomes of oncological patients have been improved dramatically, creating new options for conditions previously deemed not curable [3,4]. Over the past decades, patient outcomes have also improved in cancer patients admitted to the intensive care unit (ICU) [5]. Furthermore, ICU survivors with cancer show similar quality of life and remission rates as non-ICU cancer patients [6,7]. Moreover, as a result of the new therapies, intensive care physicians are increasingly confronted with cancer patients requiring ICU admission for infectious or toxic therapy-related events [8–11]. For these patients, early intervention is key, as data has shown admission to the ICU in the early course of their critical illness is associated with better survival rates [6,12,13].

In general, most adverse events are preceded by changes in vital signs, which can be used to anticipate clinical deterioration [14–16]. In addition, previous data has shown that the time from physiological derangement to admission to the ICU is associated with increased mortality [17]. Medical emergency teams (METs) have been introduced as critical care response teams in order to assess and intervene early in deteriorating ward patients [18].

To our knowledge, there is only sparse data about the time of first physical derangement to medical emergency team MET interventions in oncology patients. In addition, it is currently not known if there is a difference between cancer and non-cancer patients in regard to delayed MET interventions.

Thus, this study aims to analyse the impact of time between the first signs of deterioration and MET activation on mortality in oncological and non-oncological patients. Moreover, we aim to describe the characteristics and outcomes of oncological patients requiring a medical emergency team compared to non-oncological patients in a large MET database at a tertiary centre.

## Materials and methods

This retrospective cohort study was conducted at University Hospital Bern (Insel-spital) in Switzerland, a tertiary academic centre with approximately 900 beds and an interdisciplinary ICU. This study is part of the MET cohort project, and our institution has previously published an analysis based on the same dataset [18]. Ethical approval was obtained from the Canton Bern Ethics Committee (approval no.: 2019–01260), and the study adhered to the amended Declaration of Helsinki [19]. Only the principal investigator of the project (ASM) had access to information that could identify individual participants for the purpose of data collection. Reporting followed the STROBE guidelines [20].

We included all in-hospital patients requiring a Medical Emergency Team (MET) assessment between January 1, 2012, and May 31, 2019. Out-patients and patients with missing data on vital sign measurements were excluded. Only the first call was analysed for patients with multiple MET assessments during the same hospitalization. Oncology patients included in this analysis are those who were hospitalized in the medical oncology ward and receiving treatment for active solid or non-solid malignancies. The control group comprised all other patients requiring MET activation without any oncological diseases, patients with malignancy-related surgical treatment, or patients with oncological comorbidities not primarily linked to their hospitalization.

## Data Collection

We analysed prospectively collected data from all MET calls, recorded in a dedicated database. This included patient demographics (e.g., age, sex), time and date of the MET call, start and end of each MET call, parent ward, disposition (e.g., admission to the ICU or intermediate care (IMC) unit, or continuing treatment in on general ward), MET diagnosis, and outcome. Additionally, data on ICU and hospital length of stay, mortality, vital signs up to 24 hours prior to MET call, and hospital diagnosis were extracted from the electronic records for analysis. Data was accessed from December 2019 until October 2022.

## Definitions

**Vital sign score:** The Vital Sign Score (VSS) criteria include: “threatened airway,” “respiratory rate  $<6$  or  $>36$ /min,” “oxygen saturation  $<90\%$ ,” “heart rate  $<40$  or  $>140$  bpm,” “systolic blood pressure  $\leq 90$  mmHg,” “Glasgow Coma Score (GCS)  $<13$ ,” and “concern criteria.” Each abnormal parameter scores one VSS point, summed to calculate the total VSS at a given time. Data included the total number of measurements, those meeting VSS criteria (indicating physiological derangement), and the timing of the first VSS observation. The MET activation criterion in our institution is a  $VSS > 0$ , which is deemed abnormal VSS. This includes the “concern criterion”, whereas the team can be activated for any reason at any time by a concerned member of staff.

**MET:** At our institution, the Medical Emergency Team (MET) is available 24/7 and comprises a board-certified intensive care physician or an intensive care fellow, along with a certified intensive care nurse. Activation of the MET is directed to the designated physician or nurse carrying the MET phone.

## Aims and outcomes

The aim of this study was to evaluate the association between the time from first physiological derangement as defined by  $VSS > 0$  (see below) to MET activation and mortality in oncological and non-oncological patients. The primary outcome was time from first abnormal VSS to MET activation and 30-day mortality. Subanalyses with the same outcome were performed for patients admitted to the ICU as well as the subgroups of oncological with solid vs. haematological cancer. In addition, we assessed the number and time points of VSS measurements in oncological and non-oncological patients.

## Statistical analysis

Data are presented as median with interquartile ranges for continuous variables and numbers with percentages for categorical variables. For baseline characteristics and comparison between groups, logistic regression models were applied with oncological status as the outcome and the variable of interest as the predictor. A log-rank test assessed the time from a VSS score greater than zero to the MET activation. Logistic regression models were used to evaluate the relationship between oncological status, time to MET activation (TTM), and patient mortality.

Three groups were analysed: 1) the entire population, 2) the patients admitted to ICU, and 3) the oncological subgroup (solid vs haematological tumours). Using logistic regression models, we tested whether an oncological diagnosis and the time to MET activation (hours) was associated with mortality, and adjusted for age, admission type and, in the ICU

population, disease severity expressed as APACHE II. We added an interaction term of TTM and positive oncological diagnosis, to identify an additional increase in risk in oncological patients with increasing TTM. This estimate is added to the fixed increase estimated by the TTM term. A stepwise backward elimination approach was used to define a baseline model, eliminating variables with a p-value above 0.1 to correct for disease severity. Age, tumour type, and oncological status, as well as APACHEII scores for patients admitted to the ICU were considered important variables to be associated with mortality that could be used for adjustment. All variables initially entered into the models were retained, due to the limited number of available variables that could be considered for adjustment. TTM and oncological status were then added to this model. We adjusted for disease severity for the ICU population using the APACHE II score. For the oncological subgroup, admission type was excluded, as all oncological patients were medical admission. Cases with missing data were excluded from the analysis. Model performance was assessed using multiple measures: the Area under the Receiver Operating Characteristic Curve (AUC-ROC) with bootstrap replicas ( $n=500$ ) for bias correction to evaluate discrimination ability, Nagelkerke's pseudo  $R^2$  to assess explained variance, and the Hosmer-Lemeshow test to evaluate model calibration across risk groups. Odds ratios (OR) with 95% confidence intervals (CI) were calculated for each predictor variable.

Statistical comparisons of the number of VSS measurements between oncological and non-oncological patients were performed using the Mann-Whitney U test (Wilcoxon rank-sum test) due to the non-normal distribution of these data.

All statistical analyses were performed using MATLAB (v2024a, Mathworks, Massachusetts, USA). A p-value of  $< 0.05$  was considered statistically significant. A more detailed description of the statistical analysis can be found in the supplemental file.

## Results

### Baseline data and patient characteristics

The initial database consisted of 4'068 MET calls, of which 396 (9.7%) were attributed to oncological patients. We excluded 32 calls in outpatients, and 58 calls due to missing data. After filtering for the first MET activation only, the dataset was reduced to 3,214 unique calls in 3,214 patients, of which 286 (8.9%) were oncological ([Fig 1](#)).

Oncological patients were younger (median age: 62.0 [51.0–69.0] vs 70.0 [58.0–78.0] years,  $p<0.001$ ), had a lower BMI (24.7 [21.6–27.9] vs 25.6 [22.3–29.5],  $p=0.005$ ), and experienced longer hospital stays (24.0 [12.0–37.0] vs 14.0 [8.0–25.0] days,  $p<0.001$ ) compared to non-oncological patients ([Table 1](#)). The primary reason for MET activation in both groups was “concern.” (29.6% (951/3214)). Among these, 8.5% (81/951) were oncological patients compared to 91.5% (870/951) non-oncological patients. MET activations triggered by “concern” were associated with lower rates of subsequent ICU/IMC admission compared to other activation criteria (33.6% vs. 56.3%,  $p<0.001$ ). Among oncological patients, the most common MET diagnoses were respiratory (21.7%) and infectious (34.3%). Approximately half of the patients in both groups remained on the ward (55.6% oncological vs 49.9% non-oncological), while fewer than half were admitted to the ICU (42.3% oncological vs 45.6% non-oncological). A small proportion was transferred to the intermediate care unit (2.1% oncological vs 4.4% non-oncological, [Table 1](#)). Further details on the oncological subgroup are provided in Tables S1 and S2 of the [S1 File](#).

### VSS Measurements and MET activation

Of the total 3,214 patients, 1,604 (49.9%) met the MET criteria in the 24 hours prior to MET activation (at least one time point with abnormal VSS prior to the assessment triggering the MET call). Among oncological patients, 177 out of 286 (61.9%) had an abnormal VSS prior to the MET activation, compared to 1,427 out of 2,928 (48.7%) of non-oncological patients ( $p<0.001$ ). Oncological patients had significantly more VSS measurements than non-oncological patients (median 24 [16–37] vs 18 [10–27],  $p<0.001$ ). This difference was became even more pronounced in patients with positive VSS scores (median 18 [10–27] vs 0 [0–3],  $p<0.001$ , Supplementary Figure S1, S2 and S3 in [S1 File](#)). The most common

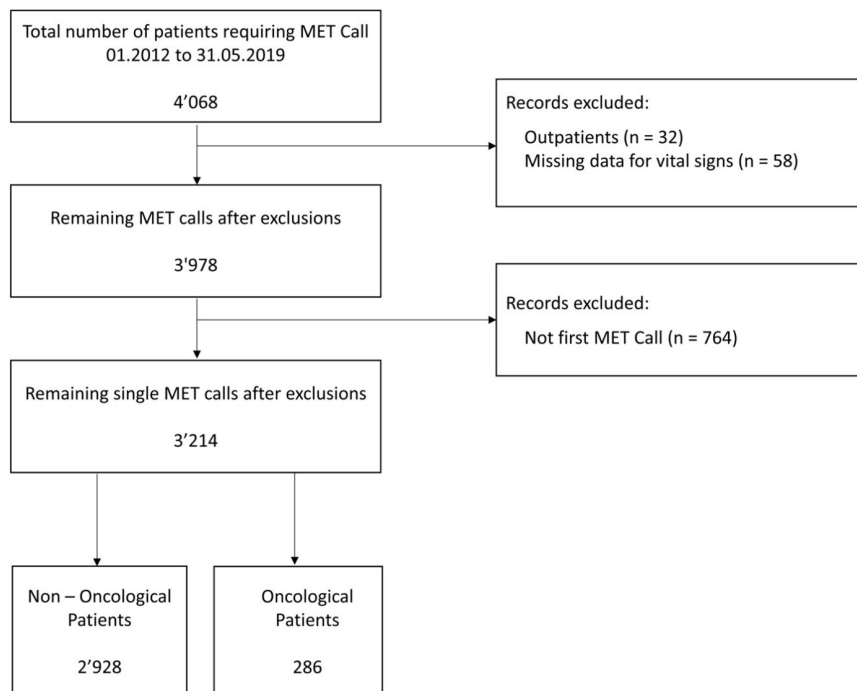

**Fig 1. Study flowchart.**

<https://doi.org/10.1371/journal.pone.0324831.g001>

reason for an abnormal VSS score was low systolic blood pressure (43.2%), followed by low oxygen saturation (34.1%). Supplementary Figure S4 in [S1 File](#) shows the distribution of pathological measurements for various vital signs in oncological and non-oncological patients. There was no significant difference in the time from the first abnormal VSS to MET activation between oncological and non-oncological patients ([Fig 2](#)).

### Primary outcome

In the analysis of the overall population, oncological status was significantly associated with 30-day mortality (OR 2.60, 95% CI 1.86–3.61,  $p < 0.001$ ) after adjusting for age, admission type, and time from first abnormal VSS to MET activation ([Table 2](#)).

Time from first abnormal VSS to MET activation was independently associated with increased 30-day mortality (OR 1.03 per hour, 95% CI 1.02–1.05,  $p < 0.001$ ), with no additional increase in mortality risk in oncological patients (interaction term,  $p = 0.141$ ), [Fig 3](#).

### Subgroup of oncological patients

Time from first abnormal VSS to MET activation was not significantly associated with mortality in the oncological patient group (OR 1.02 per hour, 95% CI 0.99–1.06,  $p = 0.230$ ) when the interaction term was included ( $p = 0.140$ ). Among the oncological patients, the 30-day mortality rate was similar between haematological and solid tumour patients (36.4% vs 43.9%) (Supplementary Table S3 in [S1 File](#)). In the logistic regression model for oncological patients, tumour type (solid vs. haematological) did not significantly predict 30-day mortality (OR 1.68, 95% CI 0.84–3.39,  $p = 0.145$ ). Age (OR 1.02 per year, 95% CI 1.01–1.00,  $p = 0.020$ ) was a significant predictor of mortality in this subgroup ([Table 3](#)). Subgroup analysis of ICU patients can be found in the supplemental file (Figure S4 and Table S3 in [S1 File](#)).

**Table 1. Baseline characteristics.**

| Variable                                    | Non-oncological Patients | Oncological      | p-value |
|---------------------------------------------|--------------------------|------------------|---------|
| Age, median years [IQR]                     | 70.0 [58.0-78.0]         | 62.0 [51.0-69.0] | < 0.001 |
| Sex, N (%)                                  |                          |                  |         |
| - Male                                      | 1,848 (63.1)             | 186 (65.0)       | 0.52    |
| - Female                                    | 1,080 (36.9)             | 100 (35.0)       |         |
| BMI (kg/m <sup>2</sup> ), median [IQR]      | 25.6 [22.3-29.5]         | 24.7 [21.6-27.9] | 0.005   |
| Admission Type, N (%)                       |                          |                  |         |
| - Surgical                                  | 1,238 (42.3)             | 0 (0.0)          | N/A     |
| - Medical                                   | 1,689 (57.7)             | 286 (100.0)      |         |
| MET calling criterion, N (%)                |                          |                  | < 0.001 |
| - Systolic blood pressure                   | 414 (16.4)               | 54 (23.5)        |         |
| - Drop in GCS                               | 258 (10.2)               | 20 (8.7)         |         |
| - Concern                                   | 870 (34.5)               | 81 (35.2)        |         |
| - Low oxygen Saturation                     | 569 (22.6)               | 28 (12.2)        |         |
| - High or low heart rate                    | 177 (7.0)                | 29 (12.6)        |         |
| - Threatened airway                         | 138 (5.5)                | 10 (4.3)         |         |
| - Seizure                                   | 67 (2.7)                 | 3 (1.3)          |         |
| - High or low respiratory rate              | 26 (1.0)                 | 5 (2.2)          |         |
| MET diagnosis group, N (%)                  |                          |                  |         |
| - Neurological                              | 489 (16.7)               | 24 (8.4)         | < 0.001 |
| - Infection - <i>all</i>                    | 449 (15.3)               | 98 (34.3)        |         |
| - Infection – <i>central nervous system</i> | 15 (0.5)                 | 2 (0.7)          |         |
| - Respiratory                               | 690 (23.6)               | 62 (21.7)        |         |
| - Cardiovascular                            | 501 (17.1)               | 26 (9.1)         |         |
| - Shock - <i>haemorrhagic</i>               | 89 (3.0)                 | 5 (1.7)          |         |
| - Shock - <i>cardiovascular</i>             | 67 (2.3)                 | 1 (0.3)          |         |
| - Shock - <i>septic</i>                     | 3 (0.1)                  | 0 (0.0)          |         |
| - Metabolic, Electrolyte Disturbance        | 79 (2.7)                 | 2 (0.7)          |         |
| - Psychiatric                               | 68 (2.3)                 | 3 (1.0)          |         |
| - Gastrointestinal                          | 125 (4.3)                | 11 (3.8)         |         |
| - Renal                                     | 15 (0.5)                 | 4 (1.4)          |         |
| - Haematological                            | 11 (0.4)                 | 14 (4.9)         |         |
| - Trauma                                    | 14 (0.5)                 | 0 (0.0)          |         |
| - Allergic                                  | 3 (0.1)                  | 0 (0.0)          |         |
| - Other                                     | 310 (10.6)               | 34 (11.9)        |         |
| Disposition, N (%)                          |                          |                  |         |
| - Intensive care unit                       | 1,336 (45.6)             | 121 (42.3)       | 0.065   |
| - IMC                                       | 130 (4.4)                | 6 (2.1)          |         |
| - Remain on ward                            | 1,462 (49.9)             | 159 (55.6)       |         |
| Hospital LOS, median days [IQR]             | 14.0 [8.0-25.0]          | 24.0 [12.0-37.0] | < 0.001 |
| 30- day mortality                           | 637 (21.8)               | 109 (38.1)       | < 0.001 |

Legend: P-values were calculated using logistic regression, with the variable of interest as predictor and oncological status as the predicted variable. BMI=Body mass index; N=Number of patients; IMC=Intermediate care; LOS=Length of stay.

<https://doi.org/10.1371/journal.pone.0324831.t001>



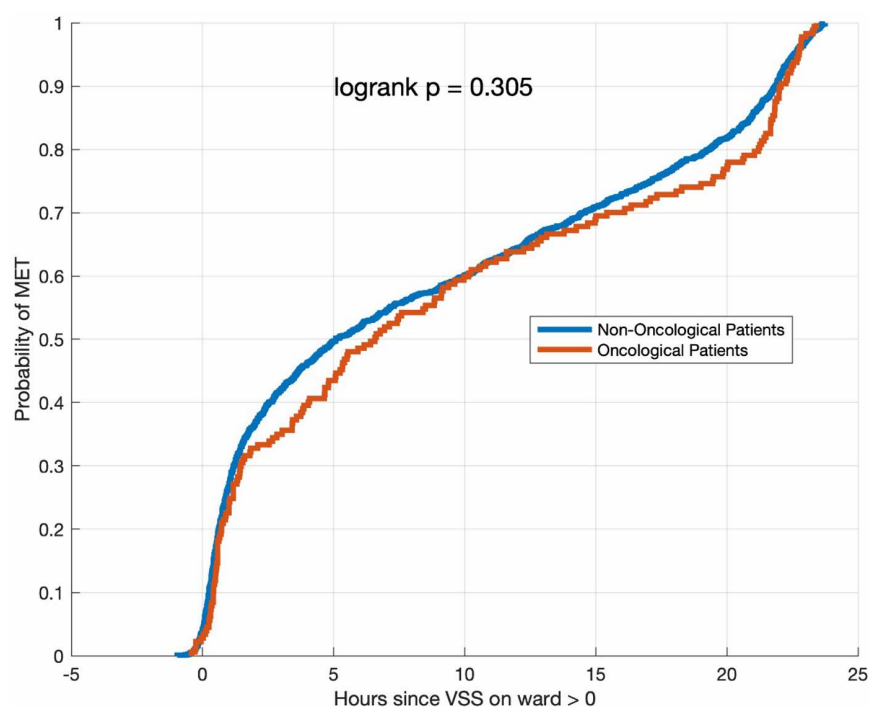

**Fig 2.** Log-rank test for the probability of MET after the first abnormal VSS.

<https://doi.org/10.1371/journal.pone.0324831.g002>

**Table 2.** Primary outcome 30-day mortality.

| Variable                                                                                                               | OR   | 95% CI Lower | 95% CI Upper | p-value |
|------------------------------------------------------------------------------------------------------------------------|------|--------------|--------------|---------|
| First abnormal VSS to MET activation [per hour]                                                                        | 1.03 | 1.02         | 1.05         | < 0.001 |
| Additional estimated OR for first abnormal VSS to MET activation [per hour] in oncological patients (Interaction Term) | 0.98 | 0.95         | 1.01         | 0.141   |
| Age                                                                                                                    | 1.03 | 1.02         | 1.04         | < 0.001 |
| Admission Type – Surgical*                                                                                             | 0.58 | 0.48         | 0.70         | < 0.001 |
| Oncological patient                                                                                                    | 2.60 | 1.86         | 3.61         | < 0.001 |

Legend: Logistic Regression Model for the Entire Population Including Interaction Term. OR = Odds ratio, CI = Confidence interval, VSS = Vital Sign Score. Admission Type: Medical or surgical.

<https://doi.org/10.1371/journal.pone.0324831.t002>

## Model performance

The predictive performance of the logistic regression models was assessed using the Area under the Receiver Operating Characteristic Curve (AUC-ROC). For the entire population, the model achieved an AUC-ROC of 0.67 (95% CI 0.64–0.68), a Nagelkerke's pseudo  $R^2$  of 0.091, and demonstrated good calibration (Hosmer-Lemeshow  $\chi^2 = 4.70$ ,  $p = 0.790$ ). The ICU population model performed with an AUC-ROC of 0.71 (95% CI 0.67–0.74), a higher explained variance (Nagelkerke's  $R^2 = 0.245$ ), and adequate calibration (Hosmer-Lemeshow  $\chi^2 = 12.80$ ,  $p = 0.119$ ). The oncological patient subgroup model had an AUC-ROC of 0.60 (95% CI 0.53–0.66), a Nagelkerke's  $R^2$  of 0.044, and good calibration (Hosmer-Lemeshow  $\chi^2 = 7.00$ ,  $p = 0.537$ ).

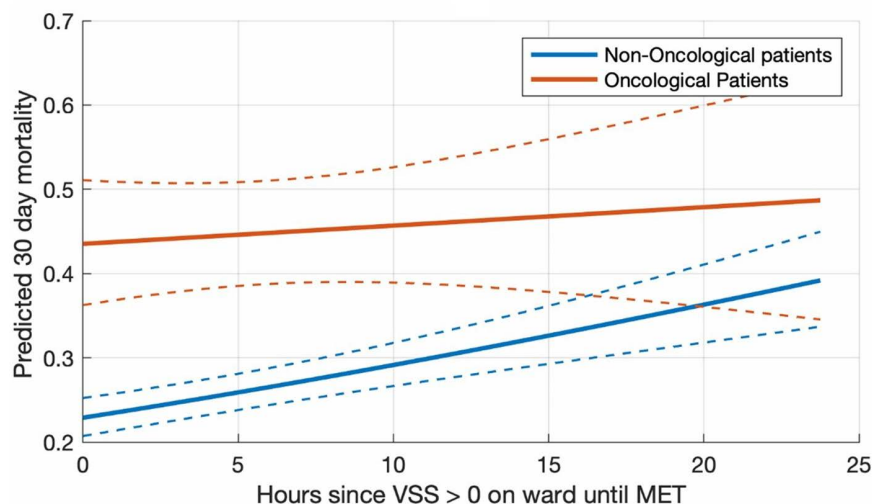

**Fig 3. Logistic regression model for the two groups and the primary outcome 30- day mortality** Legend: Predicted mortality in the total population as a function of hours since first abnormal VSS until MET activation, predicted for oncological and non-oncological patients according to the estimates provided in Table 2. The prediction assumes a median age of 69 years and a medical admission type.

<https://doi.org/10.1371/journal.pone.0324831.g003>

**Table 3. 30-day mortality in the subgroup of oncological patient.**

| Variable                                           | OR   | 95% CI Lower | 95%CI Upper | p-value |
|----------------------------------------------------|------|--------------|-------------|---------|
| First abnormal VSS to MET activation [per hour]    | 1.02 | 0.99         | 1.06        | 0.230   |
| First abnormal VSS to MET activation * tumour type | 0.95 | 0.89         | 1.02        | 0.140   |
| Age                                                | 1.02 | 1.00         | 1.04        | < 0.001 |
| Tumour type (solid)                                | 1.68 | 0.84         | 3.39        | 0.145   |

VSS = Vital Sign Score

<https://doi.org/10.1371/journal.pone.0324831.t003>

## Discussion

This study highlights the impact of oncological status on patient outcomes and MET activations in a tertiary care setting. Approximately 10% of MET calls were for patients in the oncology ward. In our cohort, each hour of delay in MET activation was associated with a 3.2% increase in the odds of 30-day all-cause mortality. The absence of statistical significance for the interaction between oncological status and time to MET activation suggests a similar effect of delayed MET activation on mortality in both oncological and non-oncological patients [19]. However, given the higher baseline mortality risk in oncological patients and the significantly higher number of vital signs measurements, delays in critical care could have clinically meaningful consequences in this population [13]. The increased frequency of VSS measurements likely reflects greater awareness of these patients' vulnerability or a lower threshold for initiating closer monitoring. However, despite this vigilance, the higher mortality rates suggest that early recognition of deterioration remains challenging. As Na et al. propose, integrating automated alert systems could improve timely responses to patient deterioration [20].

The discrepancy between increased VSS measurements and higher mortality rates in oncological patients raises important questions. It is possible that while these patients are monitored more closely, the interpretation of changes in their vital signs may be more complex due to the effects of their underlying disease or treatments. In addition, there might still be a reluctance to admit oncological patients to the ICU, which might be translated to the referring team [21]. Alternatively, the current VSS thresholds may not be optimally calibrated for oncological patients, potentially leading to delays in



recognising deterioration. There may be a need for further research into tailored monitoring strategies and with potential adjusted VSS thresholds for oncological patients [5]. In addition, dedicated management algorithms, such as the MET management algorithm for chimeric antigen receptor (CAR) – T-cell recipients, might help improve the outcome of those patients [4].

The most common triggers for MET activation were concern, low oxygen saturation, and abnormal systolic blood pressure in oncological and non-oncological patients, with similar patterns observed in both groups. This consistency suggests that despite the differences in VSS measurement frequency, the criteria for MET activation remain similar across patient populations. Our analysis reveals that “concern” was a significant MET activation criterion, yet only one-third of these patients had abnormal VSS measurements. This suggests that VSS thresholds may not capture the full spectrum of clinical deterioration, particularly subtle changes that experienced clinicians recognize. Patients activated by “concern” had lower ICU admission rates, indicating they needed evaluation but often not critical care. More comprehensive early warning systems, such as NEWS, might better detect nuanced physiological changes, particularly in oncological patients whose deterioration patterns may differ [22]. Future research should compare different early warning systems and explore tailored thresholds for specific patient populations.

In our study, oncological patients exhibited significantly higher mortality rates compared to non-oncological patients, with a 30-day mortality rate of 38.1% versus 18.0%. This increased mortality risk persisted even after adjusting for disease severity using the APACHE II score in the ICU population, where oncological patients had 96% higher odds of 30-day mortality (Supplementary Table S1 in [S1 File](#)). However, in this patient population, the association of delayed MET intervention and mortality was less pronounced. Possibly, patients left on the ward were patients with “do not resuscitate” (DNR) orders in place or the MET intervention lead to a limitation of care. From the data we collected, we are unable to conclude whether the delay in MET activation caused an ICU admission to become obsolete.

In our population, oncological patients had longer hospital stays and those admitted to ICU had a higher APACHE II score, indicating the complexity of their care requirements. These findings are in line with other studies showing a high mortality in oncological patients. Mokard and colleagues found a mortality of 45.3% in neutropenic patients admitted to the ICU and identified the need for mechanical ventilation, bloodstream infection, renal replacement therapy and allogeneic transplantation as relevant risk factors [23]. Schellengowski and colleagues described a mortality of 55.0% in de novo acute myeloid leukaemia patients requiring intensive care [7]. Furthermore, in a previous analysis we could show, that chimeric antigen T-cell recipients who required MET intervention had a significantly higher 90-day mortality than those who did not (53% vs 1%) [11].

Our analysis revealed no significant difference in 30-day mortality between solid tumours and haematological malignancies. This is in contrast to data from Soares and colleagues, where solid metastatic and haematological cancer were associated with increased mortality [24], as well as findings by Na and colleagues, where critically ill patients with haematological malignancies had a higher mortality rate than patients with solid tumours [25]. However, in our study only patients referred from the medical oncology department were deemed oncological patients and patients with surgical treatment of their cancer were in the control group, which could have contributed to these results. In addition, MET activation for a positive VSS score or concern may select oncological patients at risk independent of their tumour type, suggesting that the type of cancer may be less important than overall oncological status in predicting short-term outcomes.

## Limitations

As our models demonstrated moderate discrimination ability as measured by AUC-ROC and show relatively low Nagelkerke’s  $R^2$  values, additional factors such as specific treatments, comorbidities, or unassessed physiological parameters likely influence mortality outcomes and require further study. Nevertheless, the Hosmer-Lemeshow test results confirmed adequate model calibration across all populations, suggesting reliable risk estimation across different patient risk categories. As there is no standardized severity of illness scoring available for our non-ICU population, further statistical

adjustment for severity of illness was not feasible. This represents a significant limitation, as oncological patients may have been more severely ill compared to the rest of the population, as indicated by their higher mortality rates. Vital parameters up to 24 hours before MET calls were retrospectively extracted from electronic records, with frequent missing data for GCS and respiratory rate, potentially underestimating the number of abnormal VSS measurements. Furthermore, we limited the extraction of vital signs (VSS) to the 24-hour period preceding MET activation, as we consider this time-frame to be the most clinically relevant in the context of delayed MET activation. If a patient exhibited abnormal VSS but did not trigger a MET activation for more than 24 hours, it is possible that the patient's condition was less acute and did not necessitate immediate intervention. Consequently, our analysis may not fully capture the impact of earlier physiological derangements on outcomes and is applicable only to measurements within the 24-hour period prior to MET activation. In addition, as this is single-centre data, outcome comparisons across multiple ICUs are not feasible.

## Conclusion

Although outcomes did not differ significantly between oncological and non-oncological patients in our cohort, oncological patients inherently have a higher baseline mortality risk and represented approximately 10% of the study population. Notably, they underwent more frequent vital sign monitoring, suggesting increased clinical concern. Given these factors, we propose that oncological patients may benefit from a tailored approach, including earlier and more proactive Medical Emergency Team (MET) involvement. Delays in MET activation were associated with increased mortality across all patient groups, irrespective of oncological status. Therefore, individualized monitoring strategies, incorporating early MET review, may be particularly beneficial for this high-risk subgroup.

## Supporting information

**S1 File. Supplemental Digital Content.**  
(DOCX)

## Author contributions

**Conceptualization:** Kaspar F. Bachmann, Anna S. Messmer.

**Data curation:** Kaspar F. Bachmann, Samuel J. Michimura, Anna S. Messmer.

**Formal analysis:** Kaspar F. Bachmann, Anna S. Messmer.

**Investigation:** Anna S. Messmer.

**Methodology:** Kaspar F. Bachmann, Anna S. Messmer.

**Project administration:** Anna S. Messmer.

**Supervision:** Anna S. Messmer.

**Validation:** Kaspar F. Bachmann, Luca Cioccari, Joerg C. Schefold, Anna S. Messmer.

**Visualization:** Samuel J. Michimura, Anna S. Messmer.

**Writing – original draft:** Kaspar F. Bachmann, Samuel J. Michimura, Anna S. Messmer.

**Writing – review & editing:** Luca Cioccari, Joerg C. Schefold.

## References

1. Ferlay J, Soerjomataram I, Dikshit R, Eser S, Mathers C, Rebelo M. Cancer incidence and mortality worldwide: sources, methods and major patterns in GLOBOCAN 2012. *Ann Oncol.* 2015;:E359–86.
2. Howlader N, Noone AM, Krapcho M, Miller D, Bishop K, Kosary CL. SEER cancer statistics review, 1975–2014. Bethesda, MD: National Cancer Institute; 2017.

3. Maude SL, Laetsch TW, Buechner J, Rives S, Boyer M, Bittencourt H, et al. Tisagenlecleucel in children and young adults with B-cell lymphoblastic leukemia. *N Engl J Med*. 2018;378(5):439–48. <https://doi.org/10.1056/NEJMoa1709866> PMID: [29385370](#)
4. Messmer AS, Que YA, Schankin C, Banz Y, Bacher U, Novak U, et al. CAR T-cell therapy and critical care: A survival guide for medical emergency teams. *Wien Klin Wochenschr* 2021;133(23-24):1318–25.
5. Azoulay E, Schellongowski P, Darmon M, Bauer PR, Benoit D, Depuydt P, et al. The intensive care medicine research agenda on critically ill oncology and hematology patients. *Intensive Care Med*. 2017;43(9):1366–82. <https://doi.org/10.1007/s00134-017-4884-z> PMID: [28725926](#)
6. Azoulay E, Mokart D, Pène F, Lambert J, Kouatchet A, Mayaux J, et al. Outcomes of critically ill patients with hematologic malignancies: prospective multicenter data from France and Belgium—a groupe de recherche respiratoire en réanimation onco-hématologique study. *J Clin Oncol*. 2013;31(22):2810–8. <https://doi.org/10.1200/JCO.2012.47.2365> PMID: [23752112](#)
7. Schellongowski P, Staudinger T, Kundi M, Laczika K, Locker GJ, Bojic A, et al. Prognostic factors for intensive care unit admission, intensive care outcome, and post-intensive care survival in patients with de novo acute myeloid leukemia: a single center experience. *Haematologica*. 2011;96(2):231–7. <https://doi.org/10.3324/haematol.2010.031583> PMID: [21071501](#)
8. Zuber B, T T, , Grimaldi D, Charpentier J, Guidet B, et al. Impact of case volume on survival of septic shock in patients with malignancies. 2012:55–62.
9. Thiéry G, Azoulay É, Darmon M, Cioldi M, De Miranda S, Lévy V. Outcome of cancer patients considered for intensive care unit admission: a hospital-wide prospective study. *Crit Care Med*. 2005:4406–13.
10. Kostakou E, Rovina N, Kyriakopoulou M, Koulouris NG, K A. Critically ill cancer patient in intensive care unit: Issues that arise. W.B. Saunders; 2014. p. 817–22.
11. Messmer AS, Que Y-A, Schankin C, Banz Y, Bacher U, Novak U, et al. Novel adaptive t-cell oncological treatments lead to new challenges for medical emergency teams: a 2-year experience from a tertiary-care hospital in Switzerland. *Crit Care Explor*. 2021;3(10):e0552. <https://doi.org/10.1097/CCE.0000000000000552> PMID: [34651139](#)
12. Azoulay É, Castro P, Maamar A, Metaxa V, de Moraes AG, Voigt L, et al. Outcomes in patients treated with chimeric antigen receptor T-cell therapy who were admitted to intensive care (CARTTAS): an international, multicentre, observational cohort study. *Lancet Haematol*. 2021;8(5):e355–64. [https://doi.org/10.1016/S2352-3026\(21\)00060-0](https://doi.org/10.1016/S2352-3026(21)00060-0) PMID: [33894170](#)
13. Mokart D, Lambert J, Schnell D, Fouché L, Rabbat A, Kouatchet A, et al. Delayed intensive care unit admission is associated with increased mortality in patients with cancer with acute respiratory failure. *Leuk Lymphoma*. 2013;54(8):1724–9. <https://doi.org/10.3109/10428194.2012.753446> PMID: [23185988](#)
14. Schein R, Hazday N, Pena M, Ruben B, S C. Clinical antecedents to in-hospital cardiopulmonary arrest. *Crit Care Med*. 1990:1388–92.
15. Wilson R, Harrison B, Gibberd R, H J. An analysis of the causes of adverse events from the quality in Australian health care study. John Wiley & Sons, Ltd; 1999. p. 411–15.
16. Buist M, Burton P, Bernard S, Waxman B, A. J. Recognising clinical instability in hospital patients before cardiac arrest or unplanned admission to intensive care: A pilot study in a tertiary-care hospital. John Wiley & Sons, Ltd; 1999. p. 22–5.
17. Whebell SF, Prower EJ, Zhang J, Pontin M, Grant D, Jones AT, et al. Increased time from physiological derangement to critical care admission associates with mortality. *Crit Care*. 2021;25(1):226. <https://doi.org/10.1186/s13054-021-03650-1> PMID: [34193243](#)
18. Messmer AS, Elmer A, Ludwig R, Pfortmueller CA, Cioccarri L, Schefold JC. Characteristics and outcomes of medical emergency team calls in a Swiss tertiary centre - a retrospective observational study. *Swiss Med Wkly*. 2022;152:40006. <https://doi.org/10.57187/smw.2022.40006> PMID: [36455160](#)
19. Boniatti MM, Azzolini N, Viana MV, Ribeiro BSP, Coelho RS, Castilho RK, et al. Delayed medical emergency team calls and associated outcomes. *Crit Care Med*. 2014;42(1):26–30. <https://doi.org/10.1097/CCM.0b013e31829e53b9> PMID: [23989173](#)
20. Na SJ, Ko R-E, Ko MG, Jeon K. Automated alert and activation of medical emergency team using early warning score. *J Intensive Care*. 2021;9(1):73. <https://doi.org/10.1186/s40560-021-00588-y> PMID: [34876209](#)
21. Escher M, Perneger TV, Chevrolet J-C. National questionnaire survey on what influences doctors' decisions about admission to intensive care. *BMJ*. 2004;329(7463):425. <https://doi.org/10.1136/bmj.329.7463.425> PMID: [15321898](#)
22. Price C, Prytherch D, Kostakis I, Briggs J. Evaluating the performance of the National Early Warning Score in different diagnostic groups. *Resuscitation*. 2023;193:110032. <https://doi.org/10.1016/j.resuscitation.2023.110032> PMID: [37931891](#)
23. Soares M, Bozza FA, Azevedo LCP, Silva UVA, Corrêa TD, Colombari F, et al. Effects of organizational characteristics on outcomes and resource use in patients with cancer admitted to intensive care units. *J Clin Oncol*. 2016;34(27):3315–24. <https://doi.org/10.1200/JCO.2016.66.9549> PMID: [27432921](#)
24. Mokart D, Darmon M, Resche-Rigon M, Lemiale V, Pène F, Mayaux J, et al. Prognosis of neutropenic patients admitted to the intensive care unit. *Intensive Care Med*. 2015;41(2):296–303. <https://doi.org/10.1007/s00134-014-3615-y> PMID: [25578678](#)
25. Na SJ, Ha TS, Koh Y, Suh GY, Koh SO, Lim C-M, et al. Characteristics and clinical outcomes of critically ill cancer patients admitted to Korean intensive care units. *Acute Crit Care*. 2018;33(3):121–9. <https://doi.org/10.4266/acc.2018.00143> PMID: [31723875](#)
